# Supplementary material for: Relating past and present diet to phenotypic and transcriptomic variation in the fruit fly
Source: PubMed Central journal article supplement (PMC5568309; doi:10.1186/s12864-017-3968-z), 2017-08-22
Supplement: 12864_2017_3968_MOESM1_ESM.pdf [file 12864_2017_3968_MOESM1_ESM.pdf]

| Phenotype              | Adult diet | Larval diet contrast | Hazard Ratio [95% CI] | p value |
|------------------------|------------|----------------------|-----------------------|---------|
| Male Virgin Lifespan   | 0.25SY     | 0.25SY : 1SY         | 0.80 [0.68,0.94]      | 0.0056  |
|                        |            | 2.5SY : 1SY          | 0.88 [0.75,1.03]      | 0.12    |
|                        |            | 2.5SY : 0.25SY       | 1.10 [0.94,1.29]      | 0.24    |
|                        | 1SY        | 0.25SY : 1SY         | 0.71 [0.60,0.85]      | 0.0001  |
|                        |            | 2.5SY : 1SY          | 1.33 [1.12,1.58]      | 0.0013  |
|                        |            | 2.5SY : 0.25SY       | 1.87 [1.56,2.24]      | <0.0001 |
|                        | 2.5SY      | 0.25SY : 1SY         | 0.69 [0.59,0.80]      | <0.0001 |
|                        |            | 2.5SY : 1SY          | 1.11 [0.95,1.29]      | 0.198   |
|                        |            | 2.5SY : 0.25SY       | 1.61 [1.37,1.89]      | <0.0001 |
| Female Virgin Lifespan | 0.25SY     | 0.25SY : 1SY         | 1.00 [0.86,1.16]      | 0.99    |
|                        |            | 2.5SY : 1SY          | 1.37 [1.18,1.60]      | <0.0001 |
|                        |            | 2.5SY : 0.25SY       | 1.37 [1.17,1.60]      | <0.0001 |
|                        | 1SY        | 0.25SY : 1SY         | 0.67 [0.57,0.78]      | <0.0001 |
|                        |            | 2.5SY : 1SY          | 1.33 [1.15,1.55]      | 0.0002  |
|                        |            | 2.5SY : 0.25SY       | 1.99 [1.70,2.34]      | <0.0001 |
|                        | 2.5SY      | 0.25SY : 1SY         | 0.70 [0.60,0.81]      | <0.0001 |
|                        |            | 2.5SY : 1SY          | 1.43 [1.23,1.67]      | <0.0001 |
|                        |            | 2.5SY : 0.25SY       | 2.05 [1.75,2.40]      | <0.0001 |
| Male Mated Lifespan    | 0.25SY     | 0.25SY : 1SY         | 1.07 [0.79,1.45]      | 0.65    |
|                        |            | 2.5SY : 1SY          | 0.93 [0.69,1.25]      | 0.62    |
|                        |            | 2.5SY : 0.25SY       | 0.86 [0.63,1.18]      | 0.36    |
|                        | 1SY        | 0.25SY : 1SY         | 0.73 [0.52,1.02]      | 0.062   |
|                        |            | 2.5SY : 1SY          | 0.82 [0.59,1.15]      | 0.24    |
|                        |            | 2.5SY : 0.25SY       | 1.13 [0.82,1.56]      | 0.46    |
|                        | 2.5SY      | 0.25SY : 1SY         | 0.86 [0.62,1.19]      | 0.37    |
|                        |            | 2.5SY : 1SY          | 1.49 [1.09,2.02]      | 0.011   |
|                        |            | 2.5SY : 0.25SY       | 1.73 [1.26,2.37]      | 0.0007  |
| Female Mated Lifespan  | 0.25SY     | 0.25SY : 1SY         | 0.88 [0.66,1.16]      | 0.36    |
|                        |            | 2.5SY : 1SY          | 0.78 [0.59,1.03]      | 0.084   |
|                        |            | 2.5SY : 0.25SY       | 0.89 [0.68,1.18]      | 0.42    |
|                        | 1SY        | 0.25SY : 1SY         | 0.95 [0.72,1.25]      | 0.71    |
|                        |            | 2.5SY : 1SY          | 1.42 [1.07,1.89]      | 0.016   |
|                        |            | 2.5SY : 0.25SY       | 1.50 [1.11,2.01]      | 0.0076  |
|                        | 2.5SY      | 0.25SY : 1SY         | 1.10 [0.82,1.48]      | 0.52    |
|                        |            | 2.5SY : 1SY          | 1.50 [1.11,2.04]      | 0.0089  |
|                        |            | 2.5SY : 0.25SY       | 1.37 [1.02,1.834]     | 0.039   |
