# Supplementary material for: Relating past and present diet to phenotypic and transcriptomic variation in the fruit fly
Source: PubMed Central journal article supplement (PMC5568309; doi:10.1186/s12864-017-3968-z), 2017-08-22

a.

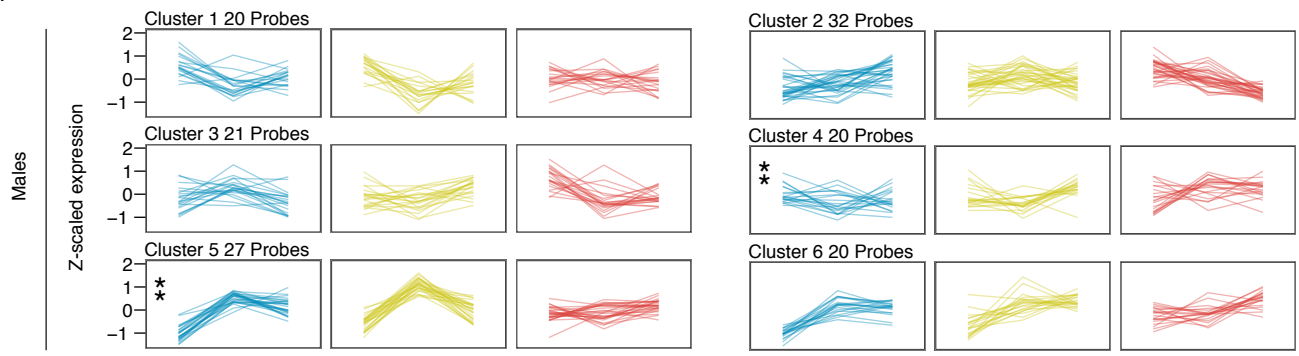

b.

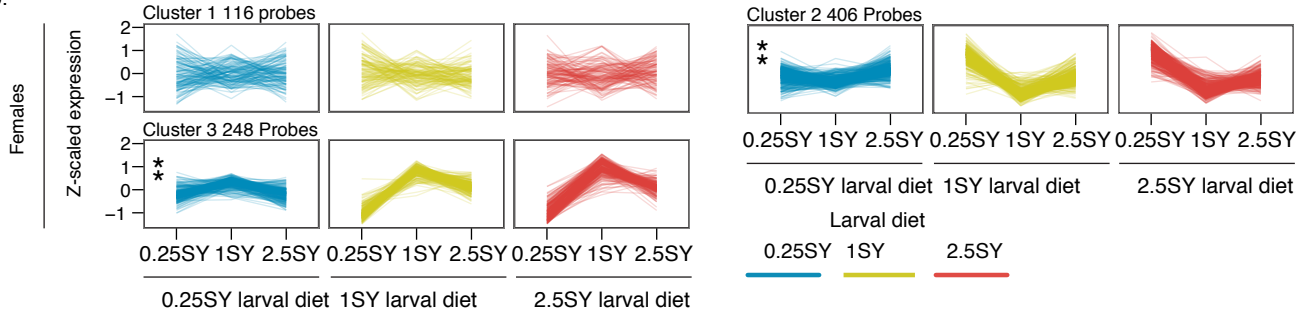

Supplement: 12864_2017_3968_MOESM3_ESM.pdf [file 12864_2017_3968_MOESM3_ESM.pdf]
